# Supplementary material
Source: publisher site journal article supplement (https://www.dovepress.com/article/supplementary_file/544535/Supplementary%20Materials_1_1.docx)
Supplement: Supplementary file 1 [file Supplementary%20Materials_1_1.docx]

Supplementary Materials

## Supplementary Figure 1


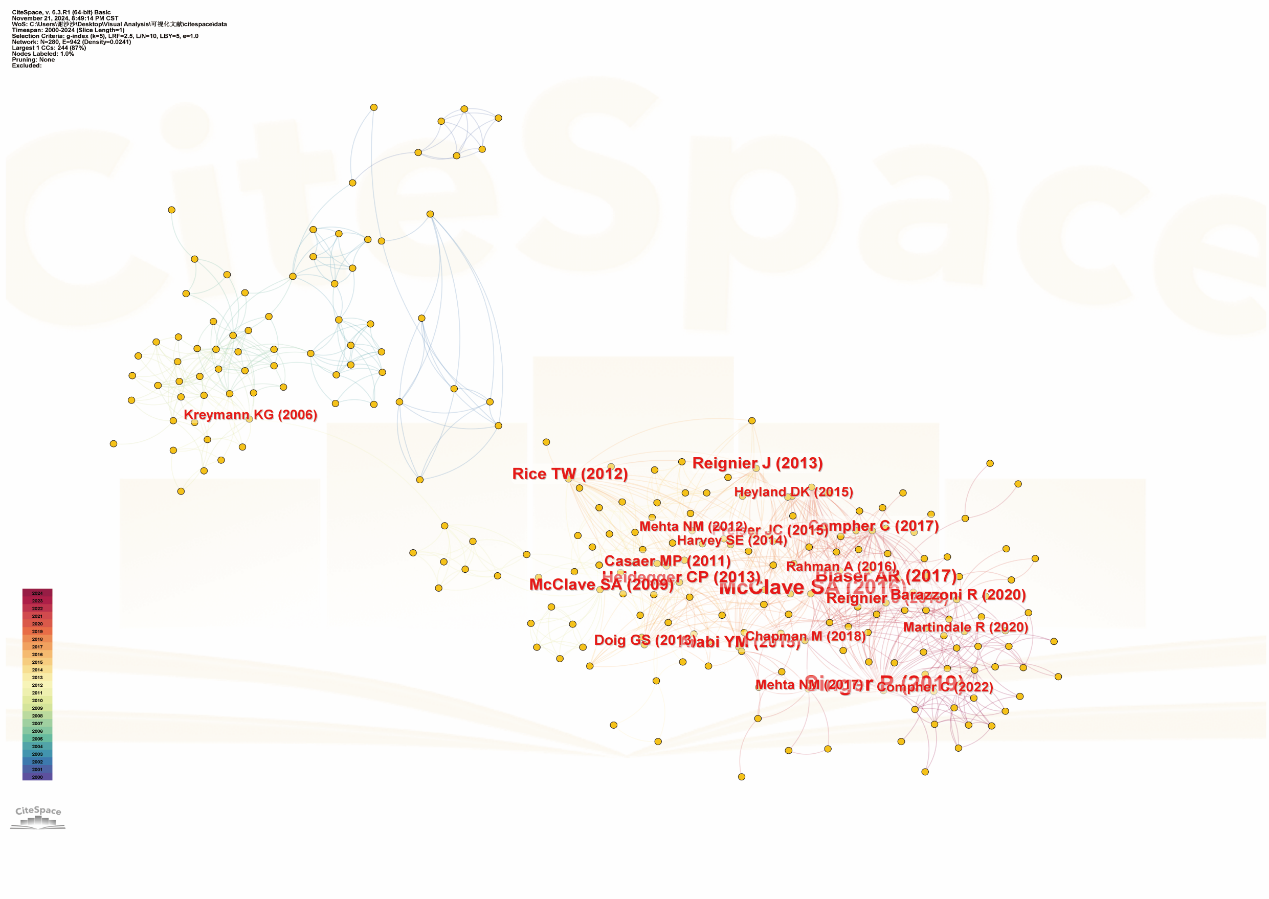


## Supplementary Figure 1: Visual analysis of co-citation patterns of references. Each point in the figure corresponds to a co-cited document, and connections between points indicate co-citation links. The size of the nodes indicates the frequency of citations or the amount of attention received by the study.

## Supplementary Figure 2


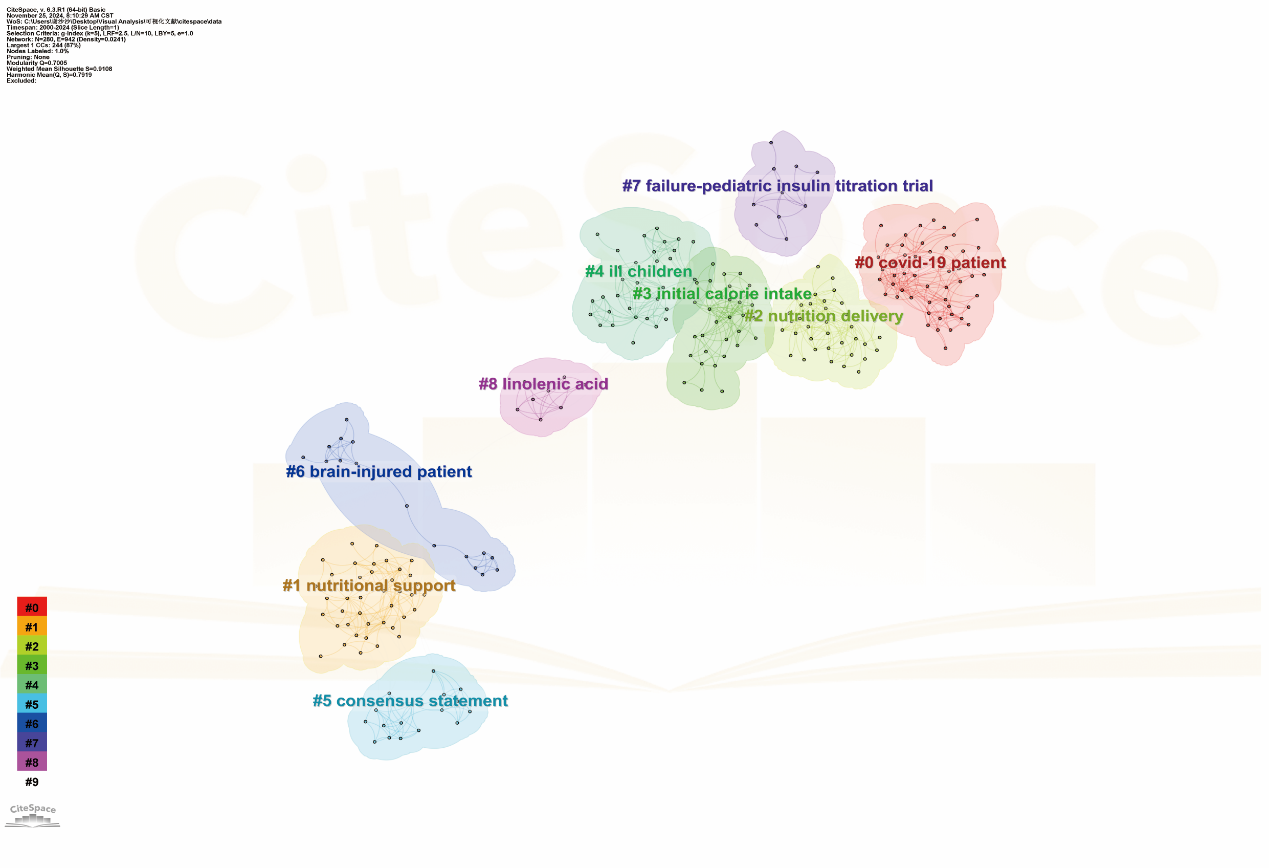


## Supplementary Figure 2: Cluster view visualization schematic.

## Supplementary Figure 3


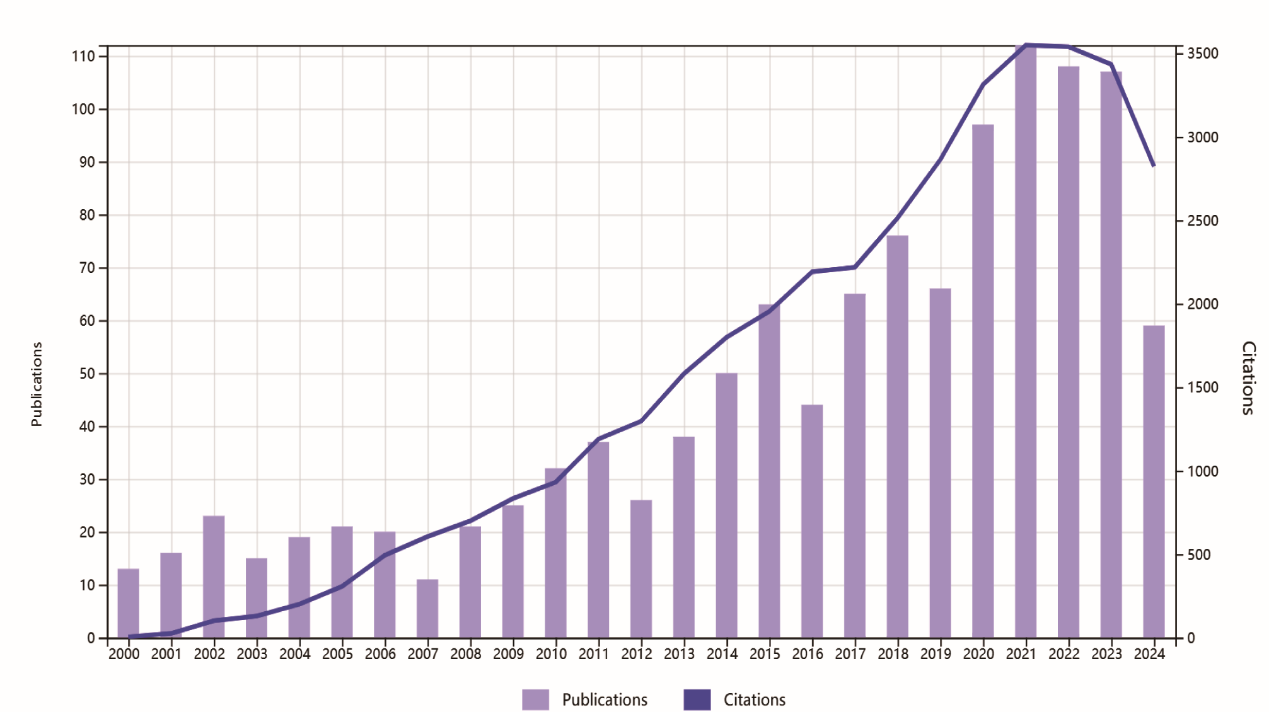


Supplementary Figure 3: Data from the Web of Science Core Collection showing overall publication trends in papers related to enteral nutrition therapy in mechanically ventilated patients.
